# Supplementary material
Source: PubMed Central journal article supplement (PMC11028724)
Supplement: 262_2016_1945_MOESM1_ESM.pdf [file 262_2016_1945_MOESM1_ESM.pdf]

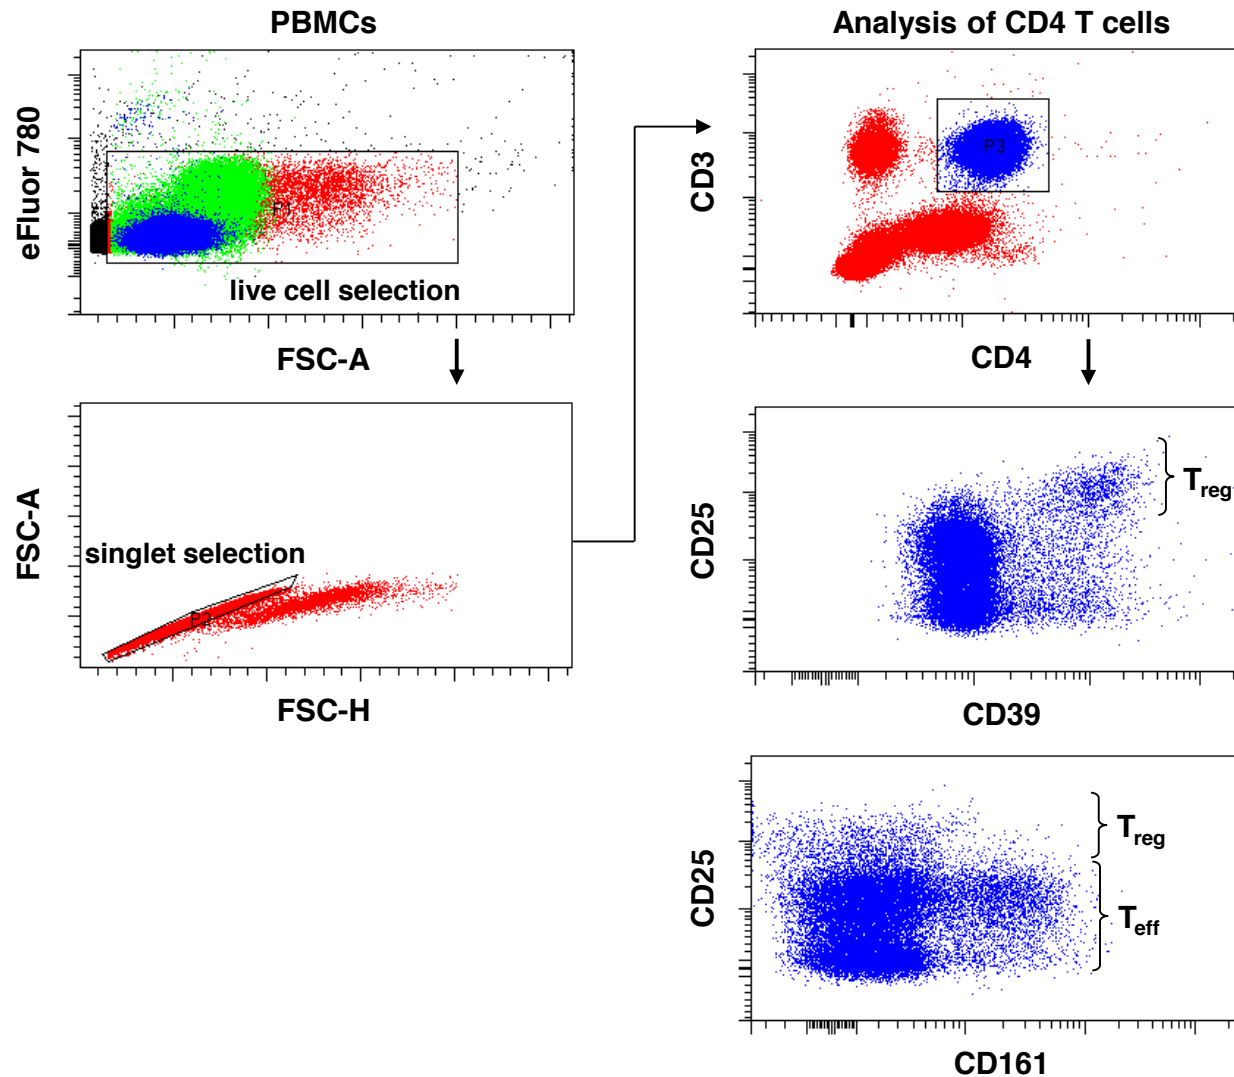

**Supplementary Figure 1. Gating strategy for flow cytometry analysis.** Live-dead discrimination and doublet discrimination by the indicated cell gating, analysis of CD4<sup>+</sup> T cells, CD4<sup>+</sup>CD25<sup>+</sup> T cells, differentiation of effector T cells (T<sub>eff</sub>) and regulatory T cells (T<sub>reg</sub>) based on CD39 and CD161.

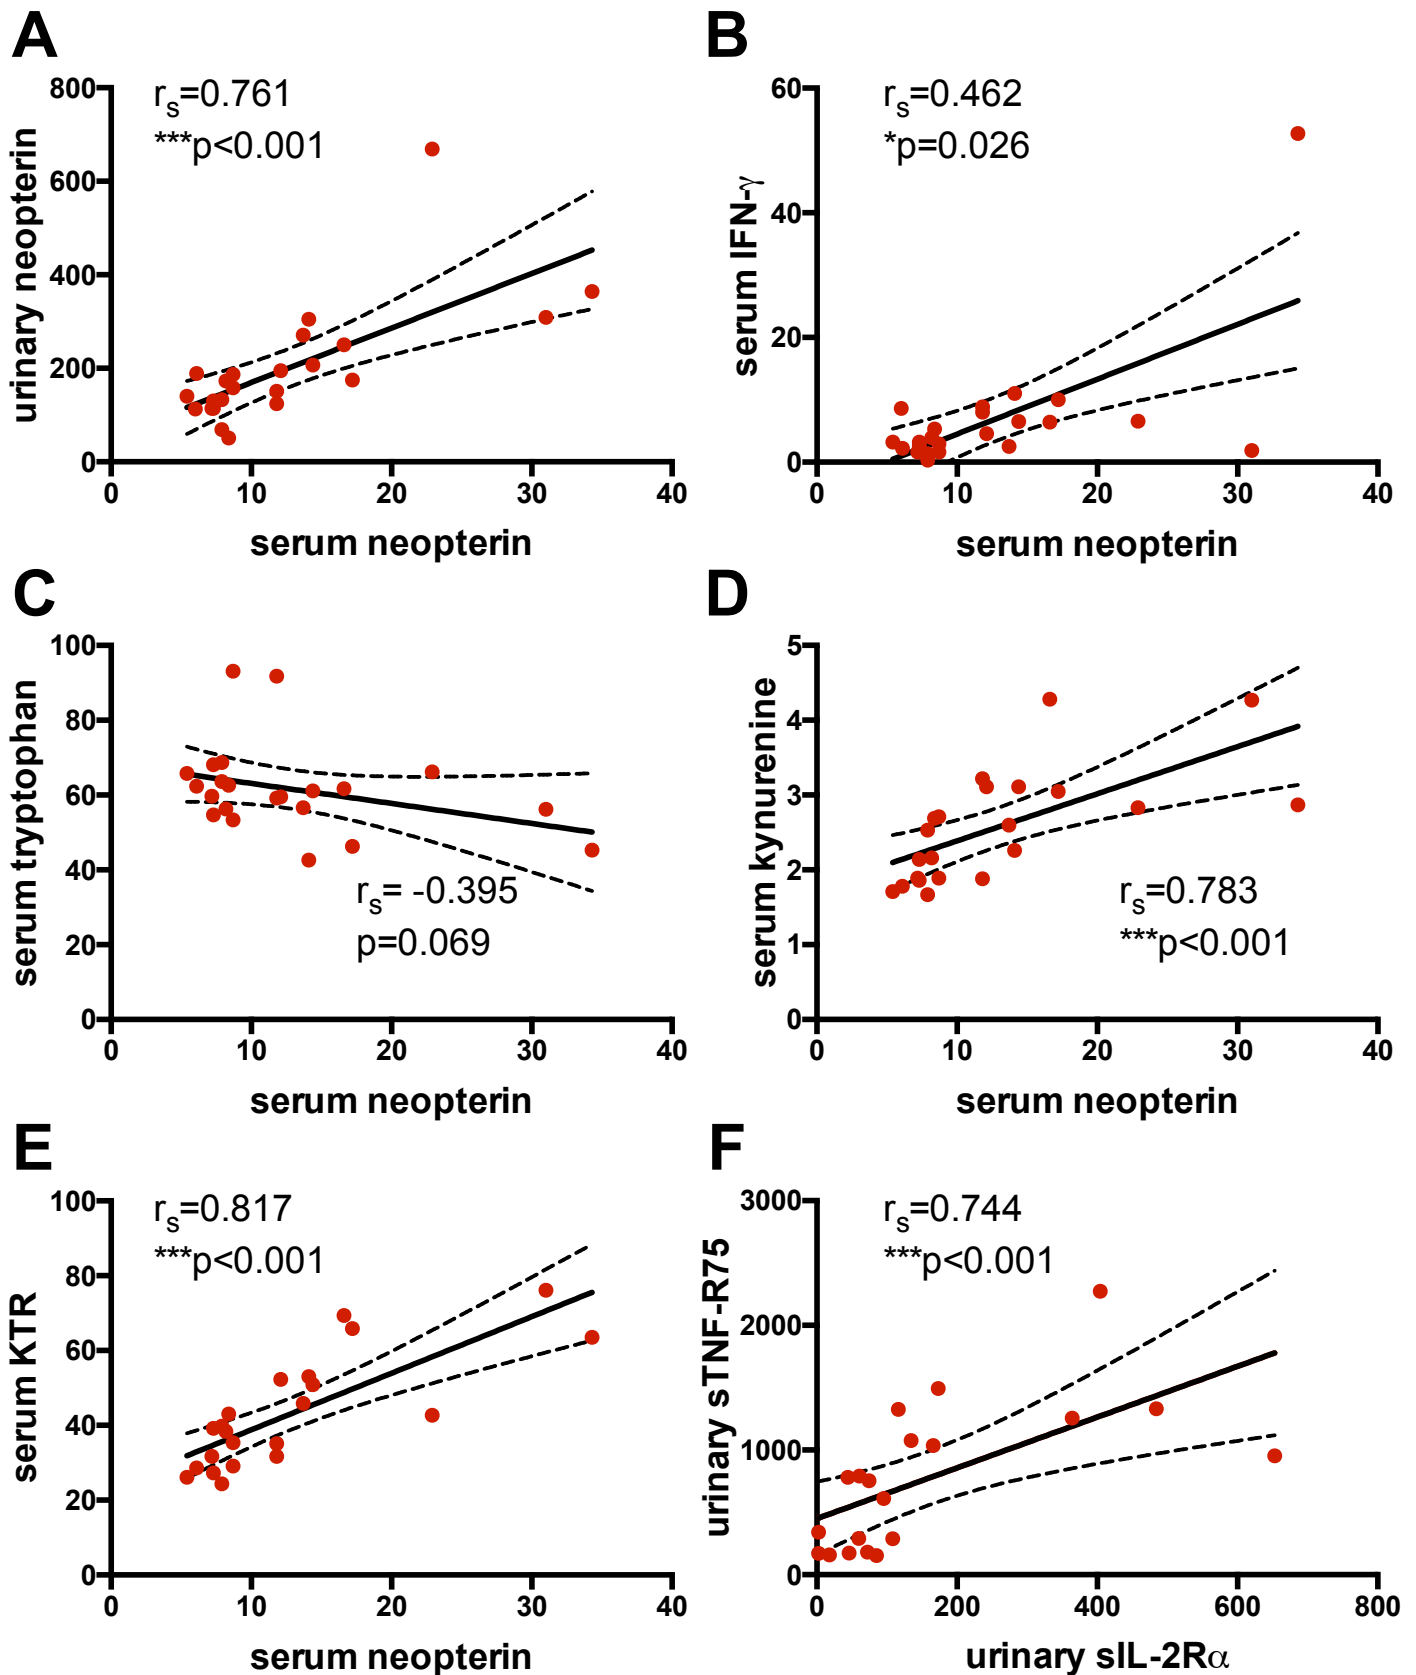

**Supplementary Figure 2.** Correlation analysis (and 95% confidence bands) at baseline between serum neopterin and A) urinary neopterin; B) serum IFN- $\gamma$ ; C) serum tryptophan; D) serum kynurenine; E) serum KTR; and F) urinary sIL-2R $\alpha$  and sTNF-R75. P-values for  $r_s$  were corrected for multiple testing according to the Bonferroni method. \* $p<0.05$ ; \*\* $p<0.01$ ; \*\*\* $p<0.001$ .  
*Abbreviations:* Spearman's rank correlation coefficient ( $r_s$ )

| <b>Parameters</b>                    | <b>Response</b><br>(n=19) | <b>Failure</b><br>(n=4) |
|--------------------------------------|---------------------------|-------------------------|
| <b>Age</b> , mean (SD), <i>years</i> | 71.8 (7.1)                | 68.7 (9.5)              |
| <b>Gender</b> , n (%)                |                           |                         |
| Male                                 | 16 (84.2%)                | 4 (100%)                |
| Female                               | 3 (15.8%)                 | -                       |
| <b>Tumor diameter</b> , n (%)        |                           |                         |
| < 3 cm                               | 11 (57.9%)                | 3 (75.0%)               |
| ≥ 3 cm                               | 8 (42.1%)                 | 1 (25.0%)               |
| <b>Number of tumors</b> , n (%)      |                           |                         |
| Single                               | 8 (42.1%)                 | -                       |
| 2-7                                  | 7 (36.8%)                 | 2 (50.0%)               |
| >7                                   | 4 (21.1%)                 | 2 (50.0%)               |
| <b>T stage</b>                       |                           |                         |
| pTa                                  | 9 (47.4%)                 | -                       |
| pT1                                  | 7 (36.8%)                 | 2 (50.0%)               |
| pTa + pT1                            | 1 (5.3%)                  | -                       |
| CIS                                  | 2 (10.5%)                 | 2 (50.0%)               |
| <b>Concurrent CIS</b>                | 1 (5.3%)                  | 2 (50.0%)               |
| <b>Second TURB</b> , n (%)           | 16 (84.2%)                | 3 (75.0%)               |

**Supplementary Table 1.** Descriptive and histopathological characteristics based on oncological outcome to BCG.
